# Supplementary material
Source: PubMed Central journal article supplement (PMC3864433)
Supplement: mbt0001-0068-SD1.pdf [file mbt0001-0068-SD1.pdf]

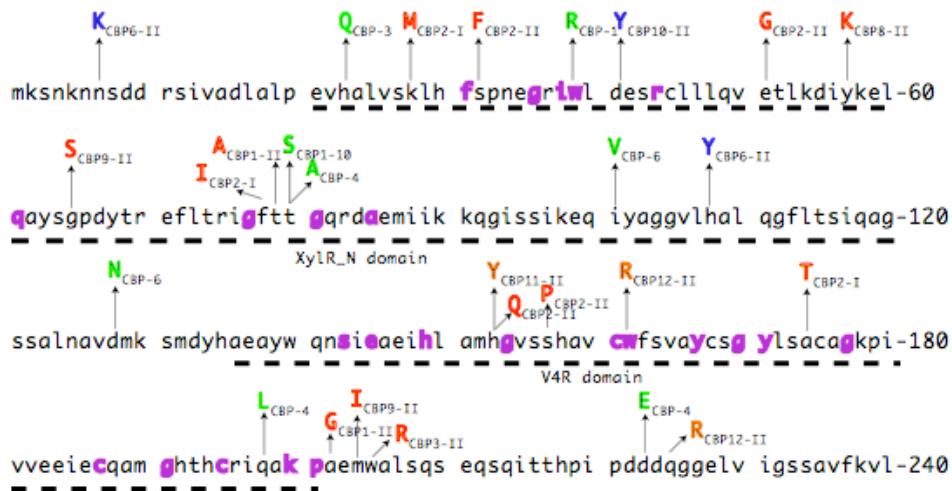

**Fig. S1.** Position of mutations in HbpR mutants listed in Table 1 on the amino acid sequence of the HbpR A-domain. Two conserved domains (XylR\_N and V4R) are indicated per dotted line. Position of conserved amino acids among all XylR members in pink on the HbpR sequence. In green, mutations resulting in 2-CBP responsiveness. Blue, increasing background plus 2-CBP responsiveness. Orange, increasing background but still 2-HBP dependent activation. In red, mutations involved in loss of 2-HBP activation and high background expression (constitutives).

Table S1. FACS separation efficiencies – Method ‘uninduced-induced’. Grey underlined values reflect the gated and separated populations which subsequently were induced in the next round or further analyzed by colony fluorescence. For example, Pool C mutants:  $\approx 98\%$  were recovered from the uninduced gate (R3), regrown and induced with 2-CBP, after which 6.5% were gated in R2 and recovered. Pool C mutants were derived from pHBP269A0, *hbpR* wild type; Pool D from *hbpR*-CBP-6 as starting point.

| Cell pool                   | Inducer <sup>a</sup> | Concentration<br>( $\mu$ M) | % induced <sup>b</sup> | Mean<br>fluorescence <sup>d</sup> | % uninduced <sup>c</sup> | Mean<br>fluorescence <sup>d</sup> |
|-----------------------------|----------------------|-----------------------------|------------------------|-----------------------------------|--------------------------|-----------------------------------|
| <i>E. coli</i><br>pHBP269A0 | -                    | -                           | 0.3/0.2                | n.r. <sup>e</sup>                 | 99.6/99.5                | 3.0/2.6                           |
|                             | 2-HBP                | 20                          | 76.7/87.1              | 176/134                           | 23.1/12.4                | n.r.                              |
|                             | 2-CBP                | 100                         | 0.6                    | n.r.                              | 99.0                     | 3.8                               |
| Pool C                      | -                    | -                           | 1.5/0.7                | n.r.                              | 97.7/99.1                | 3.5/2.9                           |
|                             | 2-HBP                | 20                          | 57.6/52.5              | 254/150                           | 41.6/47.3                | 3.0/2.5                           |
|                             | 2-CBP                | 100                         | 6.5                    | 164/118                           | 93.5                     | 4.8/3.8                           |
|                             | 2-BBP                | 100                         | 3.9                    | 46                                | 95.9                     | 2.7                               |
|                             | BP                   | 100                         | 4.6                    | 58                                | 95.2                     | 2.8                               |
|                             | Naph                 | 10                          | 0.7/0.2                | n.r.                              | 99.1                     | 2.6/2.8                           |
| <i>E. coli</i> CBP-6        | -                    | -                           | 1.1/2.9                | n.r.                              | 98.3/97.2                | 6.0/4.8                           |
|                             | 2-CBP                | 100                         | 89.4/76.8              | 81/97                             | 10.1/23.1                | n.r.                              |
|                             | 2-HBP                | 20                          | 87.5                   | 199                               | 12.0                     | n.r.                              |
|                             | Aroclor              | 40                          | 1.4                    | n.r.                              | 95.4                     | 6.0                               |
|                             | Triclosan            | 10                          | 16.5                   | 18                                | 61.5                     | 18                                |
| Pool D                      | -                    | -                           | 2.6/1.3                | n.r.                              | 96.5/98.6                | 5.8/4.0                           |
|                             | 2-HBP                | 20                          | 64.6/53.4              | 337/147                           | 34.6/46.3                | 3.2/2.6                           |
|                             | 2-CBP                | 100                         | 46.2                   | 75                                | 53.8                     | 2.7                               |
|                             | Aroclor              | 40                          | 4.9                    | n.r.                              | 95.3                     | 5.4                               |
|                             | Triclosan            | 10                          | 11.7                   | n.r.                              | 88.9                     | 8.7                               |

a) 2-HBP, 2-hydroxybiphenyl; 2-CBP, 2-chlorobiphenyl; 2-BBP, 2-bromobiphenyl; BP, biphenyl; Naph, naphthalene; -, non induced (buffer only).

b) percentage attributed to gate R2 – See Fig. 3

c) percentage attributed to gate R3 – See Fig. 3

- d) Mean fluorescence value of the particle distribution; if two peaks were clearly separatable, values for gate R2 and R3 are both reported. Arbitrary units produced by the machine. Double values (e.g., 3.5/2.9) are derived from independent repetitions of the FACS enrichment process.
- e) n.r., not relevant – See remark d.

Table S2. FACS separation efficiency – Method ‘induced-uninduced-induced’. (For explanation and example, see Table S1).

| Cell pool      | Inducer <sup>a</sup> | Concentration (μM) | % induced <sup>b</sup> | Mean fluorescence <sup>d</sup> | % uninduced <sup>c</sup> | Mean fluorescence <sup>d</sup> |
|----------------|----------------------|--------------------|------------------------|--------------------------------|--------------------------|--------------------------------|
| Pool C         | 2-CBP                | 100                | 6.9                    | 164                            | 92.4                     | 4.8                            |
|                | 2-BBP                | 100                | 5.6                    | 80                             | 93.6                     | 4.2                            |
|                | BP                   | 100                | 6.2                    | 161                            | 93.0                     | 4.3                            |
|                | Naph                 | 10                 | 1.7                    | n.r.                           | 97.6                     | 3.7                            |
| Pool C-CBP I   | -                    | -                  | 12.1/22.08             | 37/39                          | 80.3/78.1                | 8.4/8.4                        |
| Pool C-BBP I   | -                    | -                  | 12.1/22.2              | 39/41                          | 86.1/78.0                | 8.8/8.9                        |
| Pool C-BP I    | -                    | -                  | 10.8/20.0              | 42/40                          | 87.7/80.2                | 7.9/7.6                        |
| Pool C-Naph I  | -                    | -                  | 30.6/49.7              | n.r.                           | 66.4/50.4                | 31/29                          |
| Pool C-CBP II  | 2-CBP                | 20                 | 56.7                   | 62                             | 43.5                     | 2.8                            |
| Pool C-BBP II  | 2-BBP                | 100                | 54.9                   | 45                             | 45.4                     | 2.7                            |
| Pool C-BP II   | BP                   | 100                | 56.6                   | 58                             | 43.4                     | 2.8                            |
| Pool C-Naph II | Naph                 | 10                 | 39.3                   | 24                             | 51.7                     | 20                             |

a) 2-HBP, 2-hydroxybiphenyl; 2-CBP, 2-chlorobiphenyl; 2-BBP, 2-bromobiphenyl; BP, biphenyl; Naph, naphthalene; -, non induced (buffer only).

b) percentage attributed to gate R2 – See Fig. 3

c) percentage attributed to gate R3 – See Fig. 3

d) Mean fluorescence value of the particle distribution; if two peaks were clearly separatable, values for gate R2 and R3 are both reported. Arbitrary units produced by the machine. Double values (e.g., 3.5/2.9) are derived from independent repetitions of the FACS enrichment process.

e) n.r., not relevant – See remark d.

Table S3. Figures of merit for Pool D mutants enrichment process. Method 'induced-uninduced-induced'. Grey underlined are the gated and separated cell pool fractions. One can see that further enrichment from Pool D does not lead to better mutant recovery. Example, Pool D with 2-CBP: 51% of cells in R2 with mean fluorescence of 81 units. After twice separation (PoolD-CBP II), 61.9% of cells enter in R2 with 56 units of fluorescence.

| Cell pool     | Inducer <sup>a</sup> | Concentration (μM) | % induced <sup>b</sup> | Mean fluorescence <sup>d</sup> | % uninduced <sup>c</sup> | Mean fluorescence <sup>d</sup> |
|---------------|----------------------|--------------------|------------------------|--------------------------------|--------------------------|--------------------------------|
| Pool D        | -                    | -                  | 2.6                    | n.r.                           | 96.5                     | 5.4                            |
|               | 2-HBP                | 20                 | 64.6                   | 327                            | 34.6                     | 3.3                            |
|               | 2-CBP                | 100                | 51.0                   | 81                             | 48.2                     | 3.4                            |
|               | Aroclor              | 40                 | 5.3                    | n.r.                           | 93.9                     | 7.2                            |
|               | Triclosan            | 10                 | 26.7                   | 32                             | 71.6                     | 8.0                            |
| Pool D-CBP I  | -                    | -                  | 4.0/11.5               | 22/25                          | 95.0/89.1                | 8.0/7.8                        |
| Pool D-Aro I  | -                    | -                  | 27.5/42.6              | 20/20                          | 70.2/57.6                | 20/20                          |
| Pool D-Tri I  | -                    | -                  | 5.6/14.4               | 32/35                          | 93.0/86.0                | 7.9/8.0                        |
| Pool D-CBP II | 2-CBP                | 20                 | 61.9                   | 56                             | 38.1                     | n.r.                           |
| Pool D-Aro II | Aroclor              | 40                 | 14.3                   | n.r.                           | 86.4                     | 7.2                            |
| Pool D-Tri II | Triclosan            | 10                 | 30.1                   | 17                             | 71.1                     | n.r.                           |

a) 2-HBP, 2-hydroxybiphenyl; 2-CBP, 2-chlorobiphenyl; 2-BBP, 2-bromobiphenyl; BP, biphenyl; Naph, naphthalene; -, non induced (buffer only).

b) percentage attributed to gate R2 – See Fig. 3

c) percentage attributed to gate R3 – See Fig. 3

d) Mean fluorescence value of the particle distribution; if two peaks were clearly separatable, values for gate R2 and R3 are both reported. Arbitrary units produced by the machine. Double values (e.g., 3.5/2.9) are derived from independent repetitions of the FACS enrichment process.

e) n.r., not relevant – See remark d.

Table S4. Figures of merit for Pool D mutants in the counter-enrichment process, while enriching from the uninduced pool on 2-HBP. Grey underlined are the gated and separated cell pool fractions. Despite fractionating, the third round of separation (pool III-D1 etc.) is still inducible with 2-HBP.

| Cell pool   | Inducer <sup>a</sup> | Concentration (μM) | % induced <sup>b</sup> | Mean fluorescence <sup>d</sup> | % uninduced <sup>c</sup> | Mean fluorescence <sup>d</sup> |
|-------------|----------------------|--------------------|------------------------|--------------------------------|--------------------------|--------------------------------|
| Pool D      | -                    | -                  | 1.7                    | n.r. <sup>c</sup>              | 94.5                     | 3.8                            |
| I-D1P2:R3   | -                    | -                  | 0.2                    | n.r.                           | 96.9                     | 4.2                            |
|             | 2-HBP                | 20                 | 79.2                   | 179                            | 18.7                     | 1.6                            |
| II-D1P2:R3  | -                    | -                  | 0.1                    | n.r.                           | 96.3                     | 2.4                            |
|             | 2-HBP                | 20                 | 4.3                    | 313                            | 90.9                     | 2.4                            |
|             | 2-CBP                | 100                | 1.7                    | 304                            | 95.7                     | 2.4                            |
| III-D1P2:R2 | -                    | -                  | 2.4                    | n.r.                           | 85.3                     | 7.6                            |
|             | 2-HBP                | 20                 | 88.2 <sup>f</sup>      | 360                            | 9.1                      | n.r.                           |
|             | 2-CBP                | 100                | 87.2                   | 175                            | 10.2                     | n.r.                           |

a) 2-HBP, 2-hydroxybiphenyl; 2-CBP, 2-chlorobiphenyl; 2-BBP, 2-bromobiphenyl; BP, biphenyl; Naph, naphthalene; -, non induced (buffer only).

b) percentage attributed to gate R2 – See Fig. 3

c) percentage attributed to gate R3 – See Fig. 3

d) Mean fluorescence value of the particle distribution; if two peaks were clearly separatable, values for gate R2 and R3 are both reported. Arbitrary units produced by the machine. Double values (e.g., 3.5/2.9) are derived from independent repetitions of the FACS enrichment process.

e) n.r., not relevant – See remark d.

f) This value shows that the enriched mutant pool is still inducible by 2-HBP. Therefore, no ‘suppression’ of the 2-HBP activatable phenotype was achieved.

Table S5. Figures of merit for Pool D mutants in the counter-enrichment process, while enriching via the 2-CBP response fraction. Grey underlined are the gated and separated cell pool fractions. Despite fractionation, the third pool (III-D1P2:R3) contains as many 2-HBP responsive cells as 2-CBP responsive ones.

| Cell pool   | Inducer <sup>a</sup> | Concentration (μM) | % induced <sup>b</sup> | Mean fluorescence <sup>d</sup> | % uninduced <sup>c</sup> | Mean fluorescence <sup>d</sup> |
|-------------|----------------------|--------------------|------------------------|--------------------------------|--------------------------|--------------------------------|
| Pool D      | -                    | -                  | 1.4                    | n.r. <sup>c</sup>              | 94.5                     | 4.7                            |
| I-D1P2:R3   | -                    | -                  | 0.2                    | n.r.                           | 96.9                     | 4.7                            |
|             | 2-CBP                | 100                | 64.0/49.3              | 104/57                         | 31.2/37.4                | 2.5/2.0                        |
| II-D1P2:R2  | -                    | -                  | 0.6/0.3                | n.r.                           | 90.5/94.5                | 7.5/7.0                        |
|             | 2-HBP                | 20                 | 93.6/97.3              | 373/205                        | 5.2/1.9                  | 2.4                            |
|             | 2-CBP                | 100                | 90.7                   | 204                            | 7.5                      | 3.0                            |
| III-D1P2:R3 | -                    | -                  | 0.2                    | n.r.                           | 97.3                     | 2.4                            |
|             | 2-HBP                | 20                 | 11.7                   | 329                            | 83.3                     | 2.5                            |
|             | 2-CBP                | 100                | 5.0 <sup>f</sup>       | 82                             | 91.4                     | 2.5                            |

a) 2-HBP, 2-hydroxybiphenyl; 2-CBP, 2-chlorobiphenyl; 2-BBP, 2-bromobiphenyl; BP, biphenyl; Naph, naphthalene; -, non induced (buffer only).

b) percentage attributed to gate R2 – See Fig. 3

c) percentage attributed to gate R3 – See Fig. 3

d) Mean fluorescence value of the particle distribution; if two peaks were clearly separatable, values for gate R2 and R3 are both reported. Arbitrary units produced by the machine. Double values (e.g., 3.5/2.9) are derived from independent repetitions of the FACS enrichment process.

e) n.r., not relevant – See remark d.

f) This value shows that the enriched mutant pool contains as many cells inducible by 2-HBP as by 2-CBP. Therefore, no ‘suppression’ of the 2-HBP activatable phenotype was achieved.
